# Supplementary material for: The genome of Aechmea fasciata provides insights into the evolution of tank epiphytic habits and ethylene-induced flowering
Source: PubMed Central journal article supplement (PMC9452560; doi:10.1038/s42003-022-03918-4), 2022-09-07
Supplement: 42003_2022_3918_MOESM2_ESM.pdf [file 42003_2022_3918_MOESM2_ESM.pdf]

**The genome of *Aechmea fasciata* provides insights into the evolution of tank epiphytic habits  
and ethylene-induced flowering**

Zhiying Li<sup>1,2,3,4,†</sup>, Jiabin Wang<sup>1,2,3,4,†</sup>, Xuanbing Zhang<sup>5</sup>, Guohong Zhu<sup>5</sup>, Yunliu Fu<sup>1,2,3,4</sup>, Yonglin Jing<sup>1,2,3,4</sup>, Bilan  
huang<sup>1,2,3,4</sup>, XiaoBing Wang<sup>1,2,3,4</sup>, Chunyang Meng<sup>1,2,3,4</sup>, Qingquan Yang<sup>1,2,3,4</sup> & Li Xu<sup>1,2,3,4,\*</sup>

†These authors contributed equally to this work.

\*Corresponding author

Email: xlzy@263.net

1 Institute of Tropical Crop Genetic Resources, Chinese Academy of Tropical Agricultural Sciences, Danzhou 571737,  
Hainan, China.

2 Ministry of Agriculture Key Laboratory of Crop Gene Resources and Germplasm Enhancement in Southern China,  
Danzhou, 571737, Hainan, China.

3 Hainan Province Key Laboratory of Tropical Crops Germplasm Resources Genetic Improvement and Innovation,  
Danzhou 571737, Hainan, China.

4 National Gene Bank of Tropical Crops, Danzhou, 571700, Hainan, China

5 College of Horticulture and Landscape Architecture, Hainan University, Haikou, 570228, China

### GenomeScope Profile

len:359,121,772bp uniq:49% het:1.15% kcov:51.1 err:0.536% dup:5.12% k:25

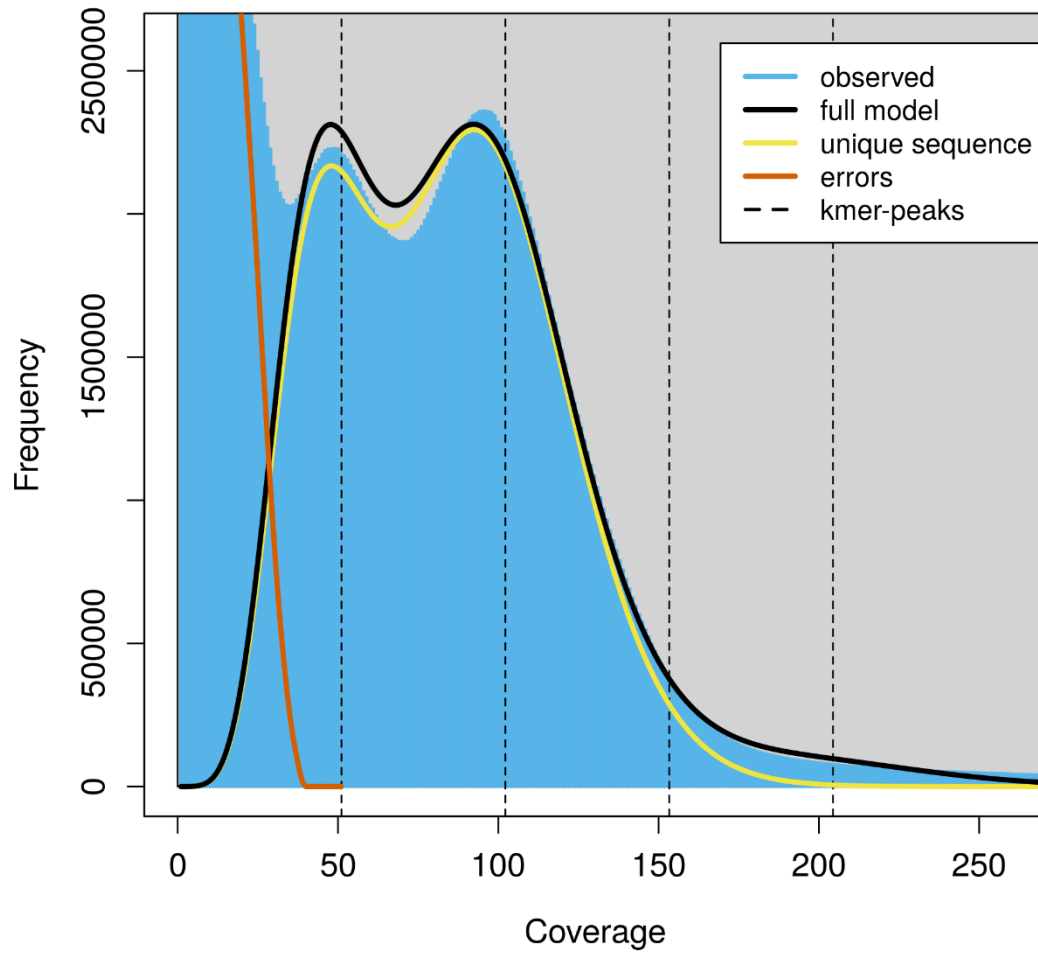

Supplementary Figure 1 Genome size estimation using GenomeScope.

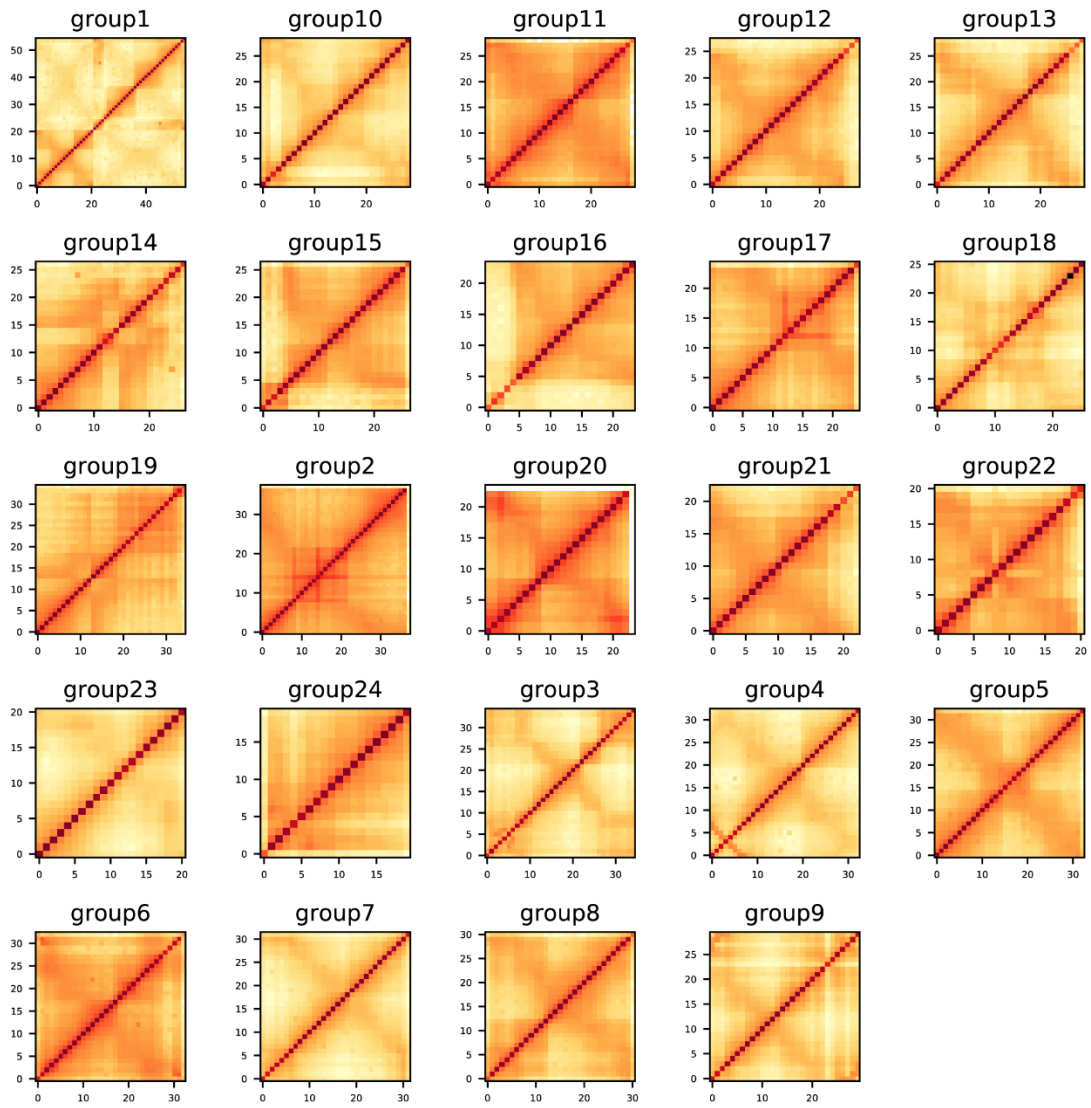

Supplementary Figure 2 Hi-C heatmap of each pseudo-chromosome.

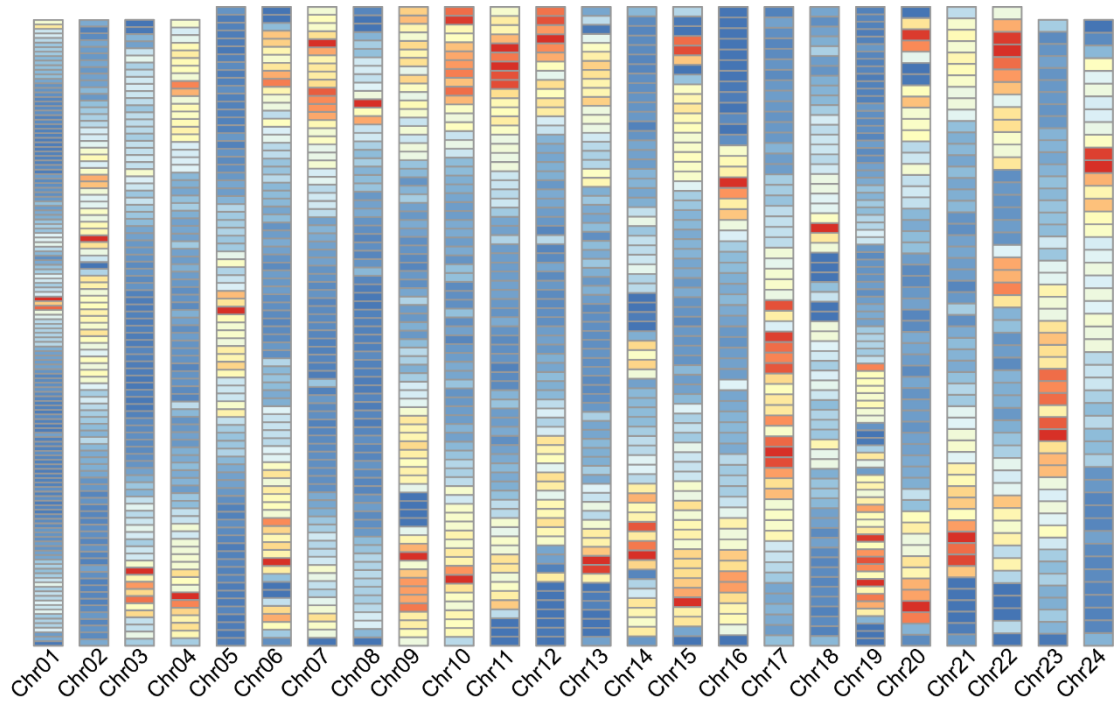

Supplementary Figure 3 Heat map of LTR distribution in each chromosome.

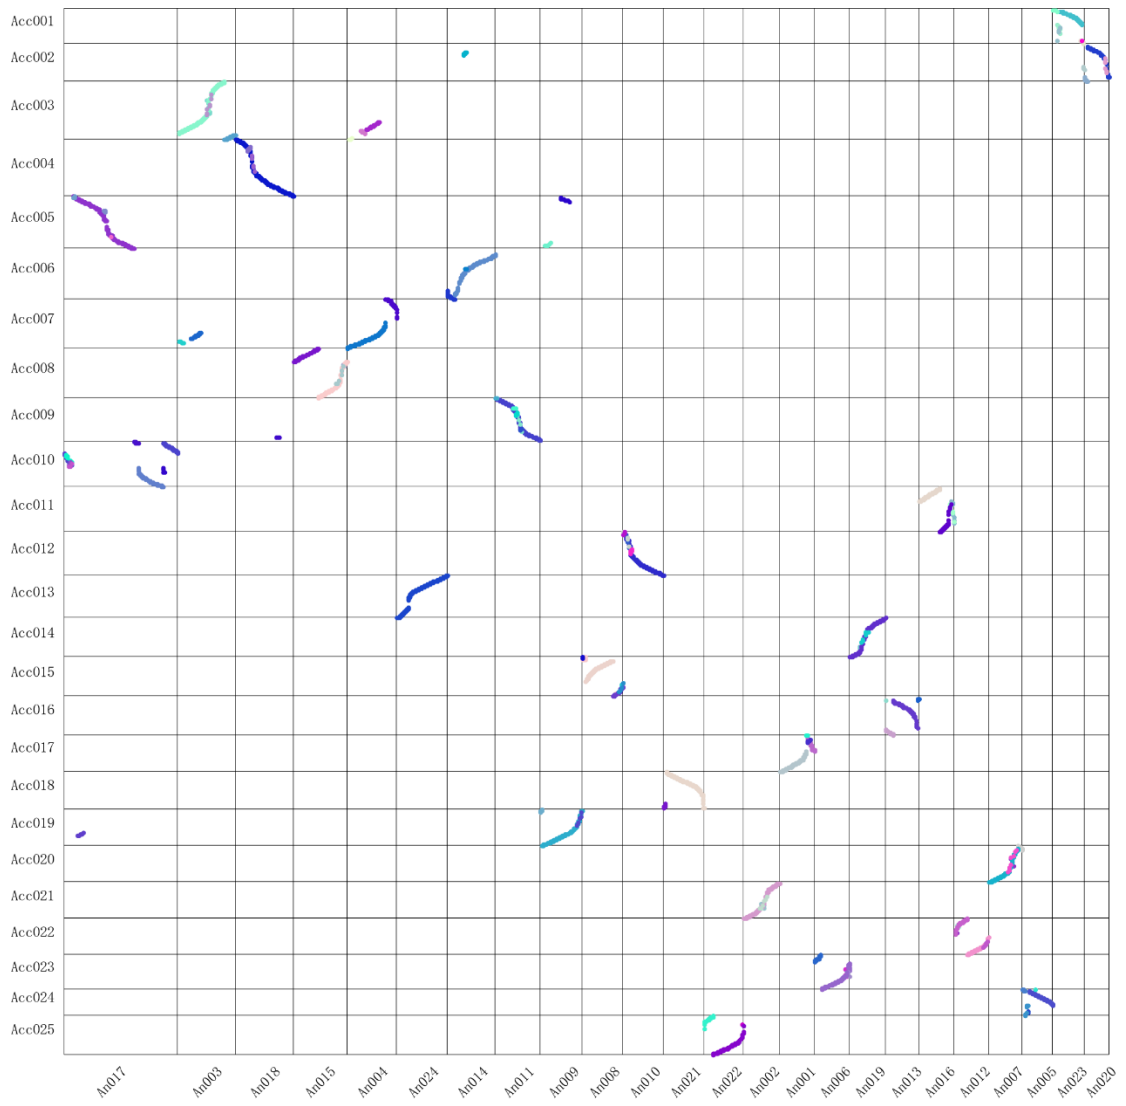

Supplementary Figure 4 Dot plot of synteny alignment between *A. comosus* and the ancestral genome.

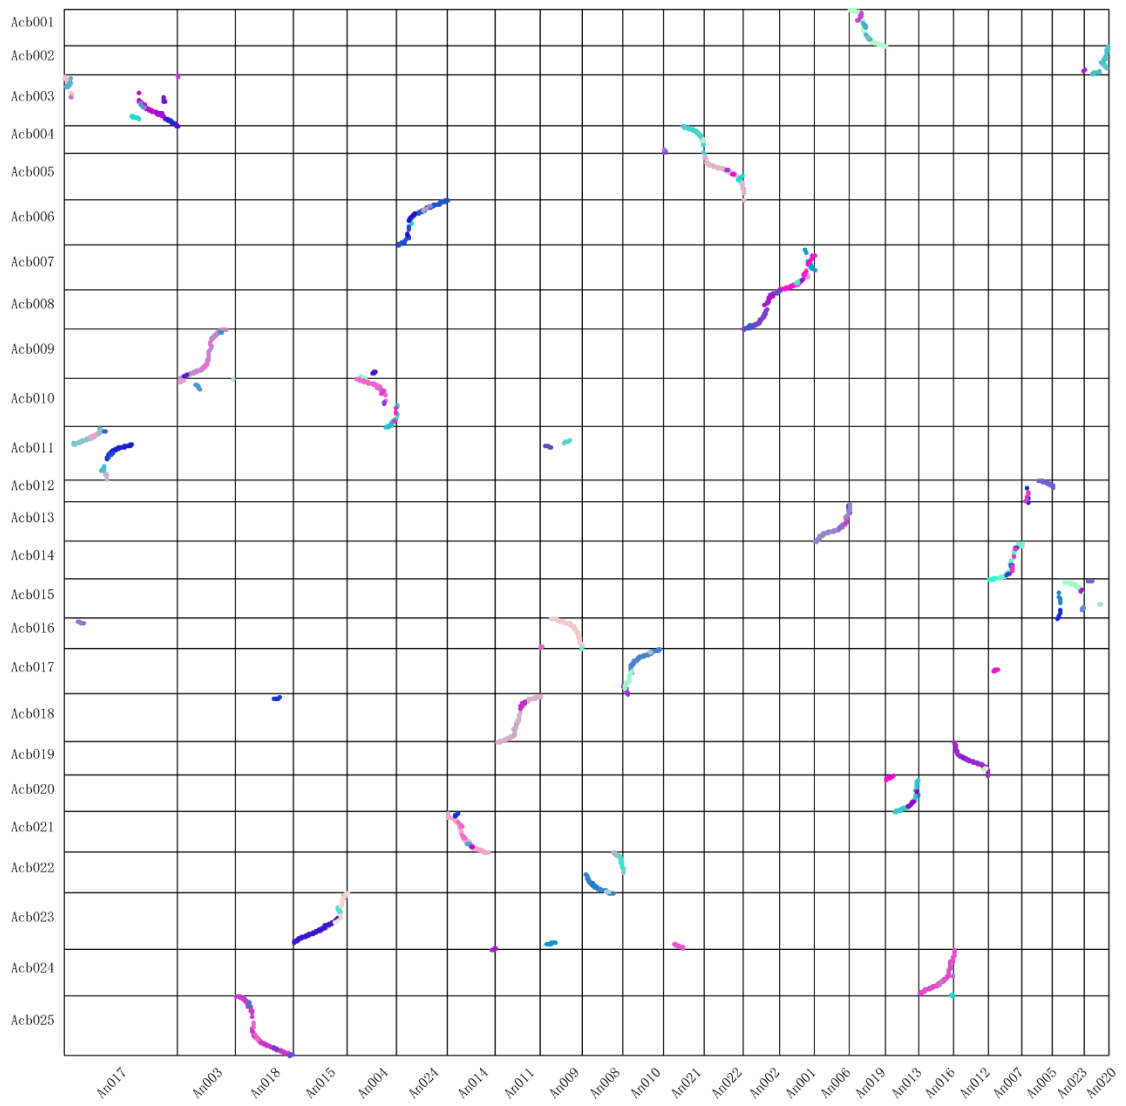

Supplementary Figure 5 Dot plot of synteny alignment between *A. bracteatus* and the ancestral genome.

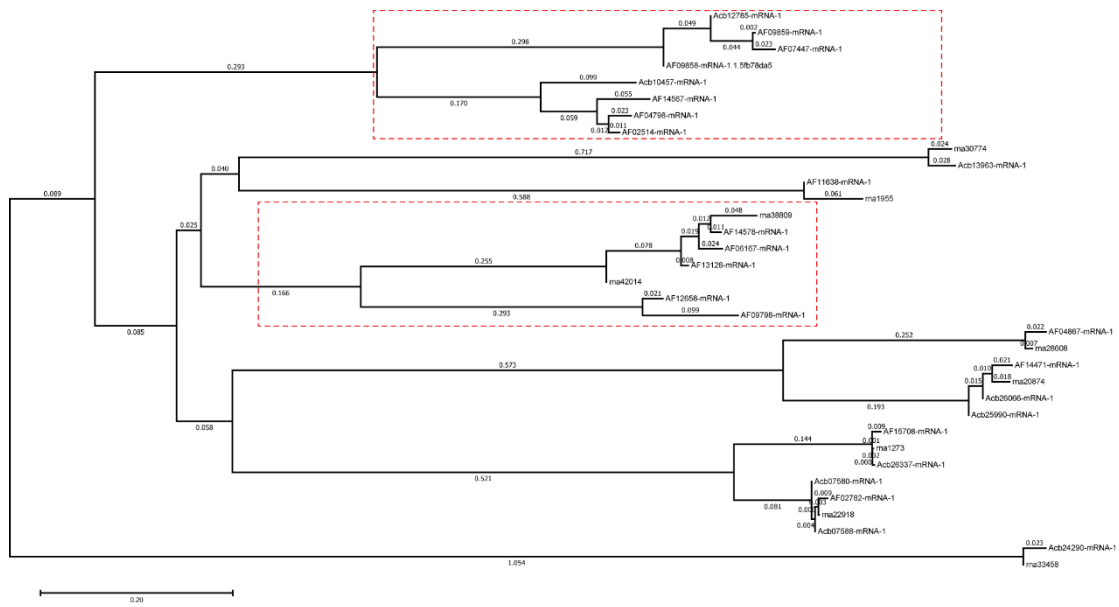

Supplementary Figure 6 Phylogenetic analysis of *Ricesleeper2* gene families.

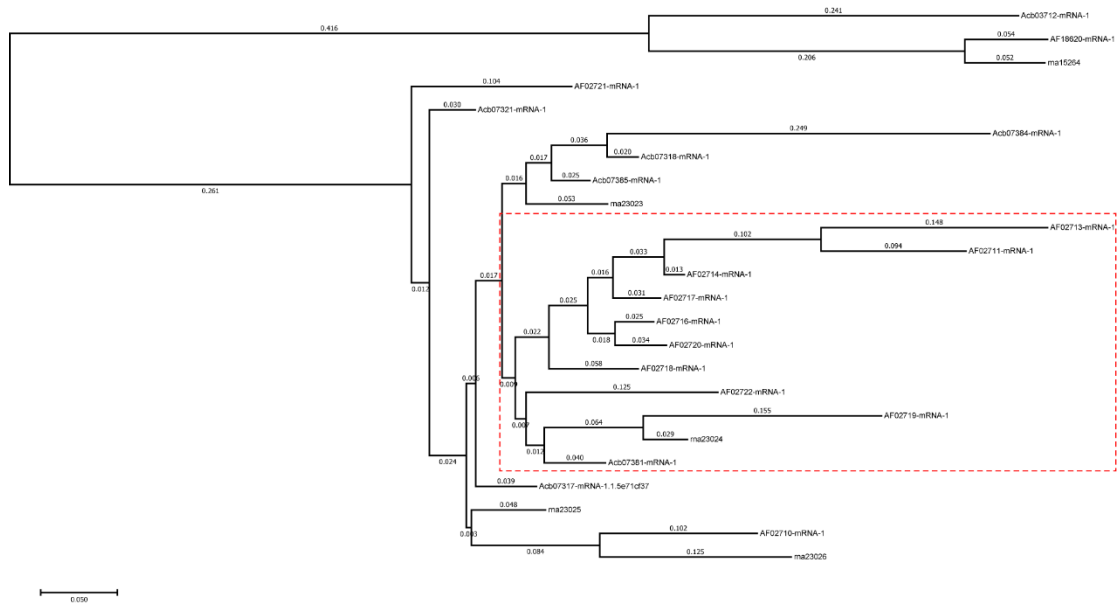

Supplementary Figure 7 Phylogenetic analysis of *TPS10* gene families.

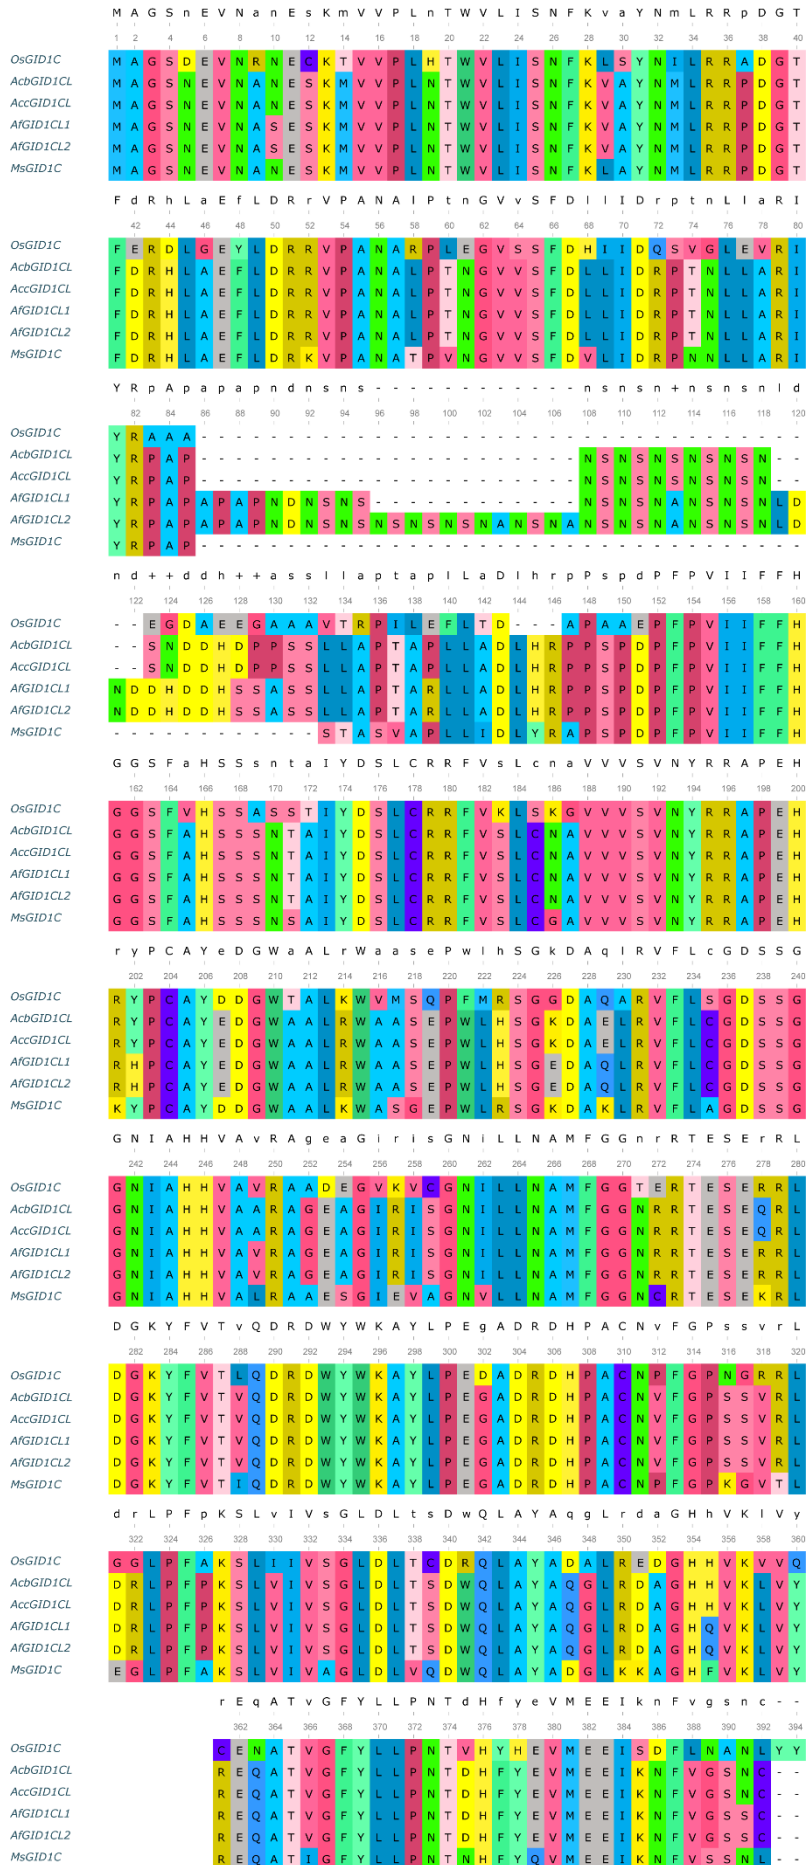



Supplementary Figure 8 Multiple alignment of *GID1C* proteins. Os, *Oryza sativa subsp. Japonica*;  
Ms, *Musa acuminata subsp. malaccensis*; Acb, *A. bracteatus*; Acc, *A. comosus*; Af, *A. fasciata*.

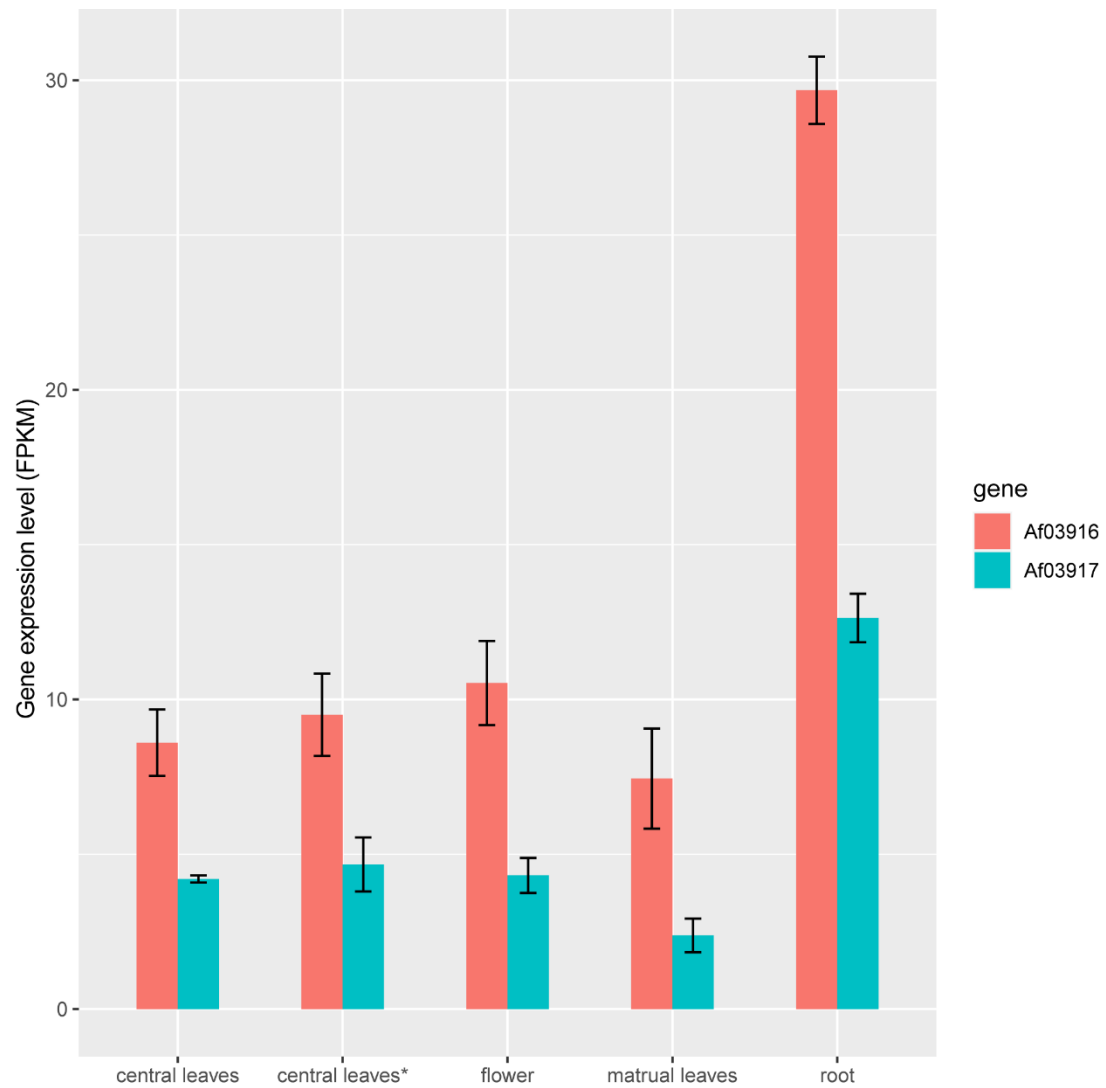

Supplementary Figure 9 Gene expression analysis of two *GID1C*-like genes in *A. fasciata*. Af03916, *AfGID1C-like1*; Af03917, *AfGDI1C-like2*.

**a** GRAS pfam03514 Pssm-ID: 397536 Cd Length: 374 Bit Score: 442.88 E-value: 5.43e-152

```

      10      20      30      40      50      60      70      80
gi 1147553370 245 LVHALLACAEAVQRENLAADALLKEISVLAASQGGAMRKVAAYFAEALARRIYN-----LRPPRPDASLFYDLYA 316
Cdd:pfam03514 1 LVHLLLACAEAVSSGDLSLAQATLARLNQLASPAQDPMQRLAAVFTALAAARLARsgssiysaLPPRPTSPDSIERISA 80

      90     100     110     120     130     140     150     160
gi 1147553370 317 H--FYEASPLKFAHFTANQAILEAFACRRVHVVDLGVRRQLWPALLQALALRPGGAPSFRLTAVGPP--ASGDALRE 392
Cdd:pfam03514 81 Yk1FYEVSPYKFGHFTANQAILEAFEGEERVHIIIDFDIGQGLQWPSLIQALASRPGGPHLRITGTIGDPqfSSAEEL 160

      170     180     190     200     210     220     230     240
gi 1147553370 393 VGWKLARFADAVRVDFRYRPLVAASLADLDAYTLQ-RPSaaaaaaaaaeveeeeeeaaeEAVAVNAVLELHQVLAQGA 471
Cdd:pfam03514 161 TGDRLAQFADSLGVVPEFNPLVAKRLEDLDLEMLDvRPG-----EALAVNCVFAHRLHLDSEVSLE 221

      250     260     270     280     290     300     310     320
gi 1147553370 472 K---VLGTVRALRPRVFTVVEQEAHNAGSFRDRFTEALHYYSTVFDLSLEGCSAGSSDR-VMAEAYVGREIANVVGCE 546
Cdd:pfam03514 222 SprdtFLRLVRSLNPKVVTLVEQEAHNHNSAPFLNRFVEALHYYSALFDSLEATLPRDSEERrKVERELLGREIVNVVACE 301

      330     340     350     360     370     380     390
gi 1147553370 547 GPERTERHETLAQWRGRMGAGFHPVPIGSDAFKQASTLLALFsgggGGGFRVEEREGCLTLCWHTRPLIATSAR 622
Cdd:pfam03514 302 GAERVERHETFGKWRERMRRAGFRPVPLSEFAVKAKLLRLYY---VDGYTVEEDNGSLVLGWKGRPLVAASAWR 374

```

**b** DELLA pfam12041 Pssm-ID: 403308 Cd Length: 68 Bit Score: 118.26 E-value: 3.76e-32

```

      10      20      30      40      50      60      70
gi 1147553370 46 DELLATLGKYVRSSDMADVAQKLEQLDMAMmgsCAAPDDGFLLSq1h1ppSDVHHYVNSDLSSWLDMSISELN 119
Cdd:pfam12041 1 DELLAVLGYKVRSSDMADVAQKLEQLEMVMG--NAQEDGISHLA-----SDTVHHYVNSDLSSWVWESMISELN 65

```

**c** GRAS pfam03514 Pssm-ID: 397536 Cd Length: 374 Bit Score: 448.65 E-value: 2.46e-154

```

      10      20      30      40      50      60      70      80
Query_9724 239 LVHLLLACAEAVQRENLAADALLKEISVLAASQGGAMRKVAAYFAEALARRIYN-----LHPPRPDASLFYDLYA 310
Cdd:pfam03514 1 LVHLLLACAEAVSSGDLSLAQATLARLNQLASPAQDPMQRLAAVFTALAAARLARsgssiysaLPPRPTSPDSIERISA 80

      90     100     110     120     130     140     150     160
Query_9724 311 H--FYEASPLKFAHFTANQAILEAFACRRVHVVDLGVRRQLWPALLQALALRPGGAPSFRLTAVGPP--ASGDALRE 386
Cdd:pfam03514 81 Yk1FYEVSPYKFGHFTANQAILEAFEGEERVHIIIDFDIGQGLQWPSLIQALASRPGGPHLRITGTIGDPqfSSAEEL 160

      170     180     190     200     210     220     230     240
Query_9724 387 VGWKLARFADAVRVDFRYRPLVAASLADLDAYTLQ-RPSaaaaaeveeeeeeaaeEAVAVNAVLELHQVLAQPGA 462
Cdd:pfam03514 161 TGDRLAQFADSLGVVPEFNPLVAKRLEDLDLEMLDvRPG-----EALAVNCVFAHRLHLDSEVSLEsprd 225

      250     260     270     280     290     300     310     320
Query_9724 463 -VLGTVRALRPRVFTVVEQEAHNAGSFRDRFTEALHYYSTVFDLSLEGCSAGSSDR-VMAEAYVGREIANVVGWEGPER 540
Cdd:pfam03514 226 tFLRLVRSLNPKVVTLVEQEAHNHNSAPFLNRFVEALHYYSALFDSLEATLPRDSEERrKVERELLGREIVNVVACEGAER 305

      330     340     350     360     370     380     390
Query_9724 541 TERHETLAQWRGRMGAGFHPVPIGSDAFKQASTLLALFsgGGGFRVEEREGCLTLCWHTRPLIATSAR 611
Cdd:pfam03514 306 VERHETFGKWRERMRRAGFRPVPLSEFAVKAKLLRLYY---YVDGYTVEEDNGSLVLGWKGRPLVAASAWR 374

```

**d** DELLA pfam12041 Pssm-ID: 403308 Cd Length: 68 Bit Score: 118.64 E-value: 3.13e-32

```

      10      20      30      40      50      60      70
Query_9724 49 DELLATLGKYVRSSDMADVAQKLEQLDMAMmgsCAAPDDGFLLSq1h1ppSDVHHYVNSDLSSWLDMSISELN 122
Cdd:pfam12041 1 DELLAVLGYKVRSSDMADVAQKLEQLEMVMG--NAQEDGISHLA-----SDTVHHYVNSDLSSWVWESMISELN 65

```

Supplementary Figure 10 Domain analysis of *AcSLR1-like* and *AfSLR1-like* based on searches of the NCBI Conserved Domain Database. a, alignment of *AcSLR1-like* at the GRAS domain; b, alignment of *AcSLR1-like* at the DELLA domain; c, alignment of *AfSLR1-like* at the GRAS domain; d, alignment

of *AfSLR1-like* at the DELLA domain.

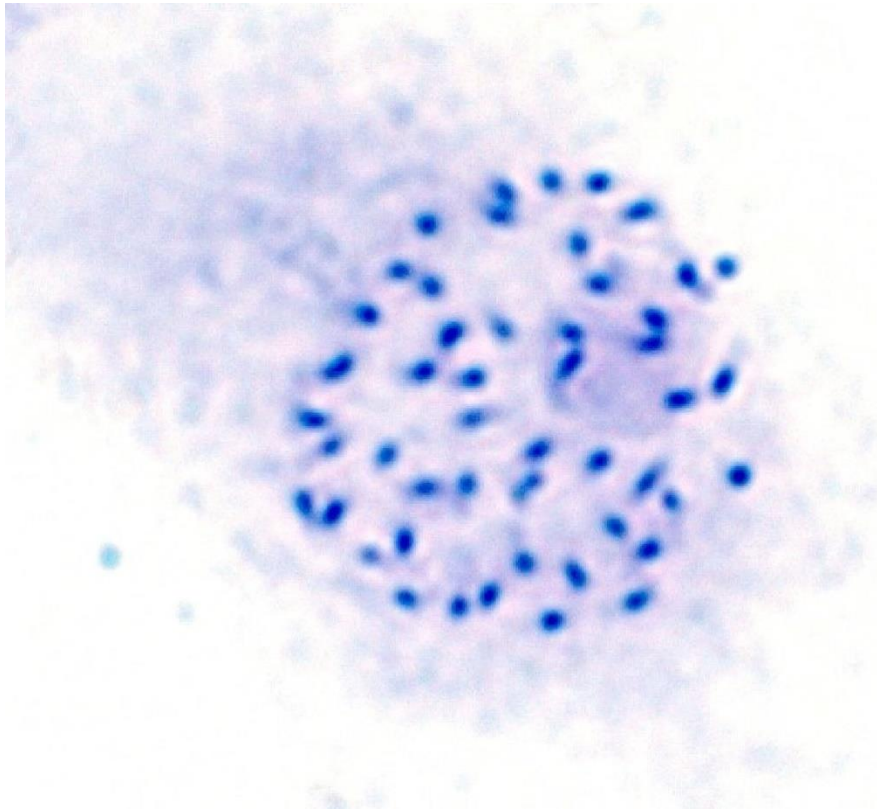

Supplementary Figure 11 Root tip chromosome karyotype analysis of *A. fasciata*.

Supplementary Table 1 Summary of genome assembly.

| Type  | Length (bp) | Count |
|-------|-------------|-------|
| N10   | 9050129     | 6     |
| N20   | 7538727     | 12    |
| N30   | 6962080     | 19    |
| N40   | 5533891     | 28    |
| N50   | 4689950     | 38    |
| N60   | 2670604     | 53    |
| N70   | 967756      | 86    |
| N80   | 509414      | 166   |
| N90   | 213451      | 329   |
| Min.  | 45520       | –     |
| Max.  | 11307573    | –     |
| Ave.  | 792203      | –     |
| Total | 529983447   | 669   |

Supplementary Table 2 Summary of protein-coding genes in *A. fasciata*.

|                                            |             |
|--------------------------------------------|-------------|
| Protein coding gene number                 | 26,216      |
| Total length of protein coding gene (bp)   | 108,991,579 |
| Average length of protein coding gene (bp) | 4157        |
| Total exon length (bp)                     | 28,099,890  |
| Average length of exon (bp)                | 198         |
| Total intron length (bp)                   | 80891689    |
| Average length of intron (bp)              | 712         |

Supplementary Table 3 Summary of BUSCO analysis of protein-coding genes from *A. fasciata* geome (93.4%).

|     |                                     |
|-----|-------------------------------------|
| 397 | Complete BUSCOs (C)                 |
| 348 | Complete and single-copy BUSCOs (S) |
| 49  | Complete and duplicated BUSCOs (D)  |
| 19  | Fragmented BUSCOs (F)               |
| 9   | Missing BUSCOs (M)                  |
| 425 | Total BUSCO groups searched         |

Supplementary Table 4 Summary of BUSCO analysis of *A. fasciata* geome (98.4%).

|     |                                     |
|-----|-------------------------------------|
| 418 | Complete BUSCOs (C)                 |
| 410 | Complete and single-copy BUSCOs (S) |
| 8   | Complete and duplicated BUSCOs (D)  |
| 5   | Fragmented BUSCOs (F)               |
| 2   | Missing BUSCOs (M)                  |
| 425 | Total BUSCO groups searched         |

Supplementary Table 5 Summary of repeat sequences in the *A. fasciata* genome.

|                     |                      | Number | Length (bp) | % of repeats | % of genome  |
|---------------------|----------------------|--------|-------------|--------------|--------------|
|                     | <b>Repeats total</b> | 499787 | 214719703   | 100          | 61.72471     |
| LTR Retrotransposon | Gypsy                | 18790  | 83223889    | 38.75932     | 23.92408     |
|                     | Copia                | 5445   | 13830252    | 6.441073     | 3.975734     |
|                     | unknown              | 14837  | 18093919    | 8.426762     | 5.201395     |
| Retrotransposon     | LINE                 | 5398   | 3349713     | 1.56004      | 0.9629301    |
|                     | SINE                 | 4      | 236         | 1.099107e-04 | 6.784208e-05 |
| Unclassified        | Unknown              | 143904 | 83787245    | 39.02168     | 24.08602     |

|                 |                |        |           |              |              |
|-----------------|----------------|--------|-----------|--------------|--------------|
| retroelement    |                |        |           |              |              |
| DNA transposon  | Helitron       | 174    | 199246    | 0.09279353   | 0.05727654   |
|                 | Academ-1       | 1      | 60        | 2.794341e-05 | 1.724799e-05 |
|                 | MuLE-MuDR      | 921    | 1586369   | 0.7388092    | 0.4560279    |
|                 | PIF-Harbinger' | 123    | 100598    | 0.04685085   | 0.02891855   |
|                 | hAT-Tip100     | 39     | 49081     | 0.02285817   | 0.01410914   |
|                 | hAT-Tag1       | 114    | 249706    | 0.01162939   | 0.0717821    |
| <b>TE total</b> |                | 189750 | 204470314 | 95.22662     | 58.77836     |
|                 | Simple_repeat  | 310037 | 10249389  | 4.773381     | 2.946356     |

Supplementary Table 6 ChIP-qPCR analysis of the binding of *AfEIL1-like* to *AfFTL2*.

| Primer: 448-1: F, TAACGCACTCTCCCCTCAA; R, TCATTTATTCACGCCCTCTG. |                  |       |             |         |     |             |                               |             |                              |                 |
|-----------------------------------------------------------------|------------------|-------|-------------|---------|-----|-------------|-------------------------------|-------------|------------------------------|-----------------|
|                                                                 |                  | CT    | AVE.        | VOL(ul) | IDF | $\Delta$ CT | $\Delta$ CT (DNA normalized ) | %INPUT      | $\Delta\Delta$ Ct [ChIP/NIS] | Fold Enrichment |
| EXP                                                             | IN 448-1         | 22.45 | 22.33       | 2       | 101 | 7.166666667 | 13.82487815                   | 0.006891234 | -2.05754719                  | 4.16            |
|                                                                 |                  | 22.38 |             |         |     |             |                               |             |                              |                 |
|                                                                 |                  | 22.16 |             |         |     |             |                               |             |                              |                 |
|                                                                 | IP 448-1<br>EIN3 | 29.45 | 29.49666667 | 200     | 51  | 10.21       | 15.88242534                   | 0.00165544  |                              |                 |
|                                                                 |                  | 28.41 |             |         |     |             |                               |             |                              |                 |
|                                                                 |                  | 30.63 |             |         |     |             |                               |             |                              |                 |
|                                                                 | IgG 448-1        |       | 32.54       | 100     | 51  | 10.21       | 15.88242534                   | 0.00165544  |                              |                 |
|                                                                 |                  | 32.54 |             |         |     |             |                               |             |                              |                 |
|                                                                 | IN 448-1         | 22.45 | 22.33       | 2       | 101 | 7.166666667 | 13.82487815                   | 0.006891234 |                              |                 |
|                                                                 |                  | 22.38 |             |         |     |             |                               |             |                              |                 |
| 22.16                                                           |                  |       |             |         |     |             |                               |             |                              |                 |

| Primer: 448-2:F, TCAAACAAAGAAATACCCCG; R, CCAACGAATCTGACGGCAT. |          |       |             |         |     |             |                               |             |                              |                 |
|----------------------------------------------------------------|----------|-------|-------------|---------|-----|-------------|-------------------------------|-------------|------------------------------|-----------------|
|                                                                |          | CT    | AVE.        | VOL(ul) | IDF | $\Delta$ CT | $\Delta$ CT (DNA normalized ) | %INPUT      | $\Delta\Delta$ Ct [ChIP/NIS] | Fold Enrichment |
| EXP                                                            | IN 448-1 | 21.96 | 22.03666667 | 2       | 101 | 6.57        | 13.22821148                   | 0.010421052 | -2.07754719                  | 4.22            |
|                                                                |          | 21.99 |             |         |     |             |                               |             |                              |                 |
|                                                                |          | 22.16 |             |         |     |             |                               |             |                              |                 |

|                  |       |             |     |    |             |             |             |  |
|------------------|-------|-------------|-----|----|-------------|-------------|-------------|--|
| IP 448-1<br>EIN3 | 28.69 | 28.60666667 | 200 |    |             |             |             |  |
|                  | 28.7  |             |     |    |             |             |             |  |
|                  | 28.43 |             |     |    |             |             |             |  |
| IgG 448-1        | 32.05 | 31.67       | 100 | 51 | 9.633333333 | 15.30575868 | 0.002468923 |  |
|                  | 31.55 |             |     |    |             |             |             |  |
|                  | 31.41 |             |     |    |             |             |             |  |
| IN 448-1         | 21.96 | 22.03666667 | 2   |    |             |             |             |  |
|                  | 21.99 |             |     |    |             |             |             |  |
|                  | 22.16 |             |     |    |             |             |             |  |
